# Supplementary material for: The prevalence of adult attention-deficit hyperactivity disorder: A global systematic review and meta-analysis
Source: PubMed Central journal article supplement (PMC7916320; doi:10.7189/jogh.11.04009), 2021-02-11
Supplement: jogh-11-04009-s001.pdf [file jogh-11-04009-s001.pdf]

## **Online Supplementary Document**

### **Song et al. The prevalence of adult attention-deficit hyperactivity disorder: a global systematic review and meta-analysis**

**Table S1.** Search strategy to identify studies reporting the prevalence of adult ADHD in the general population

**Table S2.** The time lag between investigation and publication in the included articles reporting the prevalence of adult ADHD in the general population (n=40)

**Table S3.** Quality assessment scale for rating the risk of bias

**Table S4.** Detailed characteristics of the included articles (n=40)

**Table S5.** Quality scores for assessing the quality of the included articles (n=40)

**Figure S1.** Location of the included articles reporting the prevalence of persistent adult ADHD and symptomatic adult ADHD

**Figure S2.** Pooled prevalence of persistent adult ADHD (n=20)

**Figure S3.** Leave-one-out sensitivity analysis of the influence of single study on the pooled prevalence of persistent adult ADHD

**Figure S4.** Publication bias of studies on the prevalence of persistent adult ADHD

**Figure S5.** Pooled prevalence of symptomatic adult ADHD (n=21)

**Figure S6.** Leave-one-out sensitivity analysis of the influence of single study on the pooled prevalence of symptomatic adult ADHD

**Figure S7.** Publication bias of studies on the prevalence of symptomatic adult ADHD

This supplementary material has been provided by the authors to give readers additional information about their work.

**Table S1. Search strategy to identify studies reporting the prevalence of adult ADHD in the general population**

| Database               | Access date               | Search terms                                                                                                                                                                                                                                                                                                                                                                                                                                                                                                                                  |
|------------------------|---------------------------|-----------------------------------------------------------------------------------------------------------------------------------------------------------------------------------------------------------------------------------------------------------------------------------------------------------------------------------------------------------------------------------------------------------------------------------------------------------------------------------------------------------------------------------------------|
| <b>PubMed</b>          | 2 <sup>nd</sup> Dec, 2019 | (attention deficit hyperactivity disorder[Title/Abstract] OR ADHD[Title/Abstract]) AND (Adult*[Title/Abstract]) AND (prevalence[Title/Abstract] OR epidemiology[Title/Abstract]) AND ("2000/01/01"[Date - Publication] : "3000"[Date - Publication])<br>Filter: Humans                                                                                                                                                                                                                                                                        |
| <b>MEDLINE (1950-)</b> | 2 <sup>nd</sup> Dec, 2019 | 1 exp Attention Deficit Disorder with Hyperactivity/<br>2 (attention deficit hyperactivity disorder or ADHD).ab,ti.<br>3 Adult*.ab,ti.<br>4 (prevalen* or epidemiolog*).ab,ti.<br>5 1 or 2<br>6 3 and 4 and 5<br>7 limit 6 to (humans and yr="2000 -Current" and ("all adult (19 plus years)" or "young adult (19 to 24 years)" or "adult (19 to 44 years)" or "young adult and adult (19-24 and 19-44)" or "middle age (45 to 64 years)" or "middle aged (45 plus years)" or "all aged (65 and over)" or "aged (80 and over)")) and medline) |
| <b>EMBASE (1980-)</b>  | 2 <sup>nd</sup> Dec, 2019 | 1 exp attention deficit disorder/<br>2 (attention deficit hyperactivity disorder or ADHD).ab,ti.<br>3 Adult*.ab,ti.<br>4 (prevalen* or epidemiolog*).ab,ti.<br>5 1 or 2<br>6 3 and 4 and 5<br>7 limit 6 to (human and embase and yr="2000 -Current" and article and journal and (adult <18 to 64 years> or aged <65+ years>))                                                                                                                                                                                                                 |
| <b>PsycINFO</b>        | 2 <sup>nd</sup> Dec, 2019 | 1 exp Attention Deficit Disorder with Hyperactivity/<br>2 (attention deficit hyperactivity disorder or ADHD).ab,ti.<br>3 Adult*.ab,ti.<br>4 (prevalen* or epidemiolog*).ab,ti.<br>5 1 or 2<br>6 3 and 4 and 5<br>7 limit 6 to (human and adulthood <18+ years> and ("0100 journal" or "0110 peer-reviewed journal" or "0120 non-peer-reviewed journal")) and journal article and yr="2000 -Current")                                                                                                                                          |

**Table S2. The time lag between investigation and publication in the included articles reporting the prevalence of adult ADHD in the general population (n=40)**

| Study ID | Study                                | Year of publication | Year of investigation | Time-lag (year) |
|----------|--------------------------------------|---------------------|-----------------------|-----------------|
| A1[1]    | Vigdis Elin Giaever Syrstada, et al. | 2020                | NA                    | NA              |
| A2[2]    | Kosuke Kajitani, et al.              | 2019                | 2017                  | 2               |
| A3[3]    | Paulo Mattos, et al.                 | 2018                | NA                    | NA              |
| A4[4]    | Flore Moulin, et al.                 | 2018                | 2001                  | 17              |
| A5[5]    | Lucia Romo, et al.                   | 2018                | 2016                  | 2               |
| A6[6]    | Meng Shi, et al.                     | 2018                | 2016                  | 2               |
| A7_a[7]  | Etem Erdal Ersan                     | 2017                | NA                    | NA              |
| A8[8]    | John Fayyad, et al.                  | 2017                | 2006                  | 11              |
| A9[9]    | Wakako Ito, et al.                   | 2017                | 2015                  | 2               |
| A10[10]  | Manoj Kumar, et al.                  | 2017                | NA                    | NA              |
| A11[11]  | A.Stickleya, et al.                  | 2017                | 2007                  | 10              |
| A12[12]  | E. S. Vitola, et al.                 | 2017                | 2012                  | 5               |
| A13[13]  | ArthurCaye, et al.                   | 2016                | 2011.5                | 4.5             |
| A14[14]  | Filiz Özdemirođlu, et al.            | 2016                | 2013.5                | 2.5             |
| A15[15]  | Young-sook Kwak, et al.              | 2015                | NA                    | NA              |
| A16[16]  | Terrie E. Moffitt, et al.            | 2015                | 1992                  | 23              |
| A17[17]  | P.MORTIER, et al.                    | 2015                | 2013                  | 2               |
| A18[18]  | EvelynVingilis, et al.               | 2015                | 2012                  | 3               |
| A19[19]  | Shahrokh Amiri, et al.               | 2014                | 2009                  | 5               |
| A20[20]  | Alexandre J. S. MORIN, et al.        | 2014                | 2011                  | 3               |
| A21[21]  | Estévez N, et al.                    | 2014                | 2011                  | 3               |
| A22[22]  | Tuithof M, et al.                    | 2014                | NA                    | NA              |
| A23[23]  | Cortese S, et al.                    | 2013                | 2004.5                | 8.5             |
| A24[24]  | Jahangard L, et al.                  | 2013                | NA                    | NA              |
| A25[25]  | Ashor AW                             | 2012                | 2011                  | 1               |
| A26[26]  | Das D, et al.                        | 2012                | 2008.5                | 3.5             |
| A27[27]  | de Zwaan M, et al.                   | 2012                | 2002.5                | 9.5             |
| A7_b[28] | Kavakci O, et al.                    | 2012                | NA                    | NA              |
| A28[29]  | Michielsen M, et al.                 | 2012                | 2008.5                | 3.5             |
| A29[30]  | de Zwaan M, et al.                   | 2011                | 2009                  | 2               |
| A30[31]  | Park S, et al.                       | 2011                | 2006.5                | 4.5             |
| A31[32]  | Soysal AS, et al.                    | 2011                | 2006.5                | 4.5             |
| A32[33]  | Atwoli L, et al.                     | 2010                | 2009                  | 1               |
| A33[34]  | Garnier-Dykstra LM, et al.           | 2010                | 2007.5                | 2.5             |
| A34[35]  | Polanczyk G, et al.                  | 2010                | 2006                  | 4               |
| A7_c[36] | Kilicoglu A, et al.                  | 2009                | NA                    | NA              |
| A35[37]  | Pagoto SL, et al.                    | 2009                | 2002                  | 7               |
| A36[38]  | Fayyad J, et al.                     | 2007                | 2002                  | 5               |
| A37[39]  | Faraone SV, et al.                   | 2005                | NA                    | NA              |
| A38[40]  | Kooij JJS, et al.                    | 2005                | 1998                  | 7               |

*Note: NA=not available; The average time-lag between investigation and publication was 5.35 based on 30 articles with available data.*

**Table S3. Quality assessment scale for rating the risk of bias**

| Bias type                                                 | Low risk (score=2)                                                                                                                                                                                                          | Moderate risk (score=1)                                                                                                                                                                                                                                                                                                                                                 | High risk (score=0)                                                                                                                                                                                       |
|-----------------------------------------------------------|-----------------------------------------------------------------------------------------------------------------------------------------------------------------------------------------------------------------------------|-------------------------------------------------------------------------------------------------------------------------------------------------------------------------------------------------------------------------------------------------------------------------------------------------------------------------------------------------------------------------|-----------------------------------------------------------------------------------------------------------------------------------------------------------------------------------------------------------|
| Selection (sample population)                             | <ol style="list-style-type: none"> <li>1) Sample from the general population, not a select group;</li> <li>2) Consecutive unselected population;</li> <li>3) Rationale for case and control selection explained.</li> </ol> | <ol style="list-style-type: none"> <li>1) Sample selected from large population but selection criteria not defined;</li> <li>2) Sample selection ambiguous but may be representative;</li> <li>3) Rationale for cases and controls not explained;</li> <li>4) Eligibility criteria not explained;</li> <li>5) Analysis to adjust for sampling strategy bias.</li> </ol> | <ol style="list-style-type: none"> <li>1) Highly select population making it difficult to generalise finding;</li> <li>2) Sample selection ambiguous and sample unlikely to be representative.</li> </ol> |
| Selection (sample size)                                   | <ol style="list-style-type: none"> <li>1) Sample size calculation performed and adequate.</li> </ol>                                                                                                                        | <ol style="list-style-type: none"> <li>1) Sample size calculation performed and reasons for not meeting sample size given;</li> <li>2) Sample size calculation not performed but all eligible persons studied.</li> </ol>                                                                                                                                               | <ol style="list-style-type: none"> <li>1) Sample size estimation unclear or only sub-sample studied.</li> </ol>                                                                                           |
| Selection (participation rate)                            | <ol style="list-style-type: none"> <li>1) High response rate (&gt;85%).</li> </ol>                                                                                                                                          | <ol style="list-style-type: none"> <li>1) Moderate response rate (70-85%).</li> </ol>                                                                                                                                                                                                                                                                                   | <ol style="list-style-type: none"> <li>1) Low response rate (&lt;70%);</li> <li>2) Response rate not reported.</li> </ol>                                                                                 |
| Performance bias (outcome assessment)                     | <ol style="list-style-type: none"> <li>1) Diagnosis using consistent criteria and direct examination.</li> </ol>                                                                                                            | <ol style="list-style-type: none"> <li>1) Assessment from administrative database or register;</li> <li>2) Assessment from hospital record or interviewer.</li> </ol>                                                                                                                                                                                                   | <ol style="list-style-type: none"> <li>1) Assessment from non-validated data or generic estimate from the overall population.</li> </ol>                                                                  |
| Performance bias (analytical methods to control for bias) | <ol style="list-style-type: none"> <li>1) Analysis appropriate for the type of sample (subgroup analysis/regression etc.).</li> </ol>                                                                                       | <ol style="list-style-type: none"> <li>1) Analysis does not account for common adjustment.</li> </ol>                                                                                                                                                                                                                                                                   | <ol style="list-style-type: none"> <li>1) Data confusing.</li> </ol>                                                                                                                                      |

**Table S4. Detailed characteristics of the included articles (n=40)**

| ID    | Country | WHO | WB   | Study setting                                                                                                                                        | Origin of sample | Investigation Date    | Study design    | Sampling Strategy | Diagnostic tools for Adult ADHD | Criteria used for diagnoses | Definition of Adult ADHD                                                                                                                                                     | ADHD Category          | Sample size | Cases | Age range      | Female proportion |
|-------|---------|-----|------|------------------------------------------------------------------------------------------------------------------------------------------------------|------------------|-----------------------|-----------------|-------------------|---------------------------------|-----------------------------|------------------------------------------------------------------------------------------------------------------------------------------------------------------------------|------------------------|-------------|-------|----------------|-------------------|
| A1[1] | Norway  | EUR | HIC  | The Medical Birth Registry of Norway was used to select a sample from the general population, and covered most of the geographical regions in Norway | Community        | NS                    | Cross-sectional | NS                | ASRS-18 items screener          | DSM-IV                      | A positive ADHD screen was defined as having a score of 21 or more on either of the ASRS subscales                                                                           | Symptomatic adult ADHD | 690         | 75    | 18-40          | 0.594203          |
| A2[2] | Japan   | WPR | HIC  | Kyushu University                                                                                                                                    | University       | April 2016-April 2018 | Cross-sectional | NS                | ASRS-18 items screener          | DSM-IV                      | Each item has a cut-off value (COV) of either 2 (sometimes) or 3 (often) and having four or more items in part A (ASRS-6) above the cut-off is a clinical sign of adult ADHD | Symptomatic adult ADHD | 801         | 179   | Mean age: 21.4 | 0.230961          |
| A3[3] | Brazil  | AMR | UMIC | Universidade Federal do Rio                                                                                                                          | University       | NS                    | Cross-section   | Cluster sampling  | ASRS-18 items                   | DSM-V, previous             | Students reporting at                                                                                                                                                        | Persistent adult       | 662         | 83    | Mean           | 0.581571          |

| ID | Country | WHO | WB | Study setting        | Origin<br>s of<br>sampl<br>e | Investi<br>gation<br>Date | Study<br>design | Sampling<br>Strategy | Diagnostic<br>tools for<br>Adult<br>ADHD | Criteria<br>used for<br>diagnosi<br>s | Definition of<br>Adult ADHD                                                                                                                                                                                                                                                                                                                                                                                                           | ADHD<br>Categor<br>y | Samp<br>le<br>size | Case<br>s | Age<br>ran<br>ge | Femal<br>e<br>propo<br>rtion |
|----|---------|-----|----|----------------------|------------------------------|---------------------------|-----------------|----------------------|------------------------------------------|---------------------------------------|---------------------------------------------------------------------------------------------------------------------------------------------------------------------------------------------------------------------------------------------------------------------------------------------------------------------------------------------------------------------------------------------------------------------------------------|----------------------|--------------------|-----------|------------------|------------------------------|
| 3] |         |     |    | de Janeiro<br>(UFRJ) |                              |                           | al              |                      | screeener                                | 6 months                              | least five<br>positive<br>symptoms in<br>the<br>inattention<br>and/or<br>hyperactivity<br>/impulsivity<br>domain were<br>considered<br>“ASRS<br>positive” and<br>were invited<br>to participate<br>in a second<br>stage, which<br>consisted of a<br>semi-<br>structured<br>interview<br>from the<br>ADHD<br>module of the<br>Kiddie<br>Schedule for<br>Affective<br>Disorders<br>and<br>Schizophreni<br>a (K-SADS), in<br>Portuguese, | ADHD                 |                    |           | age:<br>23-<br>6 |                              |

| ID | Country | WHO | WB | Study setting | Origin<br>s of<br>sampl<br>e | Investi<br>gation<br>Date | Study<br>design | Sampling<br>Strategy | Diagnostic<br>tools for<br>Adult<br>ADHD | Criteria<br>used for<br>diagnosi<br>s | Definition of<br>Adult ADHD                                                                                                                                                                                                                                                                                                                                                | ADHD<br>Categor<br>y | Samp<br>le<br>size | Case<br>s | Age<br>ran<br>ge | Femal<br>e<br>propo<br>rtion |  |
|----|---------|-----|----|---------------|------------------------------|---------------------------|-----------------|----------------------|------------------------------------------|---------------------------------------|----------------------------------------------------------------------------------------------------------------------------------------------------------------------------------------------------------------------------------------------------------------------------------------------------------------------------------------------------------------------------|----------------------|--------------------|-----------|------------------|------------------------------|--|
|    |         |     |    |               |                              |                           |                 |                      |                                          |                                       | <p>adapted for adults. In the second stage, occurring on another day and on an individual basis, a final ADHD diagnosis was warranted if the subject met DSM-5 criteria for at least five current inattention and/or hyperactivity /impulsivity symptoms, as well as childhood-onset inattention and/or hyperactivity / impulsivity symptoms occurring in at least two</p> |                      |                    |           |                  |                              |  |

| ID    | Country | WHO | WB  | Study setting                                                                   | Origins of sample | Investigation Date         | Study design    | Sampling Strategy | Diagnostic tools for Adult ADHD       | Criteria used for diagnoses | Definition of Adult ADHD                                                                                                                                                                                                                                   | ADHD Category          | Sample size | Cases | Age range       | Female proportion |
|-------|---------|-----|-----|---------------------------------------------------------------------------------|-------------------|----------------------------|-----------------|-------------------|---------------------------------------|-----------------------------|------------------------------------------------------------------------------------------------------------------------------------------------------------------------------------------------------------------------------------------------------------|------------------------|-------------|-------|-----------------|-------------------|
| A4[4] | France  | EUR | HIC | NS                                                                              | Community         | 1991 to 2011               | Cross-sectional | NS                | ASRS- 6 items screener                | DSM-V                       | life domains<br>Four or more positive responses are considered indicative of clinically significant symptoms (yes vs. no).Kessler's scoring algorithm involves variable cut-points (Items 1-3 use ≥2; Items 4-6 use ≥3) to identify the four or more items | Symptomatic adult ADHD | 1214        | 86    | 18-37           | 0.373147          |
| A5[5] | France  | EUR | HIC | Rouen University (Normandy) and Paris Nanterre University (Greater Paris area). | University        | October 2015 to April 2016 | Cross-sectional | NS                | ASRS- 6 items screener, WURS-25 items | DSM-IV                      | Students having a score of 46+ on the WURS and a score of 11+ on ASRS were categorized as having a                                                                                                                                                         | Persistent adult ADHD  | 1517        | 85    | Me an age: 20.6 | 0.682268          |



| ID      | Country | WHO | WB   | Study setting             | Origin of sample | Investigation Date | Study design    | Sampling Strategy           | Diagnostic tools for Adult ADHD        | Criteria used for diagnoses | Definition of Adult ADHD                                                                                                                                                                | ADHD Category          | Sample size | Cases | Age range | Female proportion |
|---------|---------|-----|------|---------------------------|------------------|--------------------|-----------------|-----------------------------|----------------------------------------|-----------------------------|-----------------------------------------------------------------------------------------------------------------------------------------------------------------------------------------|------------------------|-------------|-------|-----------|-------------------|
| A6[6]   | China   | WPR | UMIC | China medical university  | University       | June 2016          | Cross-sectional | Stratified cluster sampling | ASRS- 18 items screener, WURS-25 items | DSM-IV, previous 6 months   | potential ADHD<br>Subjects who had a WURS score≥46 and at least one dimension of ASRS score≥17 were classified as symptomatic group.                                                    | Persistent adult ADHD  | 521         | 44    | 18-25     | 0.654511          |
| A7-a[7] | Turkey  | EUR | UMIC | The Cumhuriyet University | University       | NS                 | Cross-sectional | Stratified sampling         | ASRS- 18 items screener                | DSM-IV, previous 6 months   | Two standard deviations above ASRS total and sub-scale score averages has been determined as the cutoff point and above this value has been taken as 'group with ADHD symptoms (AADHD)' | Symptomatic adult ADHD | 1247        | 39    | 18-35     | 0.577             |

| ID    | Country      | WHO           | WB        | Study setting                                                                                                                                                                                                                                                                                                                                                  | Origins of sample | Investigation Date | Study design    | Sampling Strategy                         | Diagnostic tools for Adult ADHD                                                                                              | Criteria used for diagnoses | Definition of Adult ADHD                                                                                                                                                                                                                                                                                                                    | ADHD Category         | Sample size | Cases | Age range | Female proportion |
|-------|--------------|---------------|-----------|----------------------------------------------------------------------------------------------------------------------------------------------------------------------------------------------------------------------------------------------------------------------------------------------------------------------------------------------------------------|-------------------|--------------------|-----------------|-------------------------------------------|------------------------------------------------------------------------------------------------------------------------------|-----------------------------|---------------------------------------------------------------------------------------------------------------------------------------------------------------------------------------------------------------------------------------------------------------------------------------------------------------------------------------------|-----------------------|-------------|-------|-----------|-------------------|
| A8[8] | 20 countries | EUR, EMR, AMR | HIC, LMIC | 11 in countries classified by the World Bank (World Bank 2012) as high-income countries (national surveys in Belgium, France, Germany, Italy, Netherlands, Northern Ireland, Poland, Portugal, Spain, and the USA along with a regional survey in Spain [Murcia]), 5 in countries classified as upper-middle-income countries (national surveys in Lebanon and | Community         | 2001-2012          | Cross-sectional | Multistage clustered probability sampling | WHO Composite International Diagnostic Interview (CIDI) version 3.0, Adult ADHD Clinical Diagnostic Scale (ACDS) Version 1.2 | DSM-IV, last 12 months      | Respondents with symptoms of childhood ADHD were asked whether they still had problems with inattention or impulsivity-hyperactivity and, if so, were asked about impairments due to these symptoms. A probability subsample of 154 such respondents in the US sample was administered blinded clinical follow-up interviews to assess DSM- | Persistent adult ADHD | 26744       | 749   | 18-44     | 0.570334          |

| ID  | Country | WHO | WB  | Study setting                                                                                                                                                                                                                                                                                                                            | Origin<br>s of<br>sampl<br>e | Investi<br>gation<br>Date | Study<br>design   | Sampling<br>Strategy | Diagnostic<br>tools for<br>Adult<br>ADHD | Criteria<br>used for<br>diagnosi<br>s | Definition of<br>Adult ADHD                                                                           | ADHD<br>Categor<br>y | Samp<br>le<br>size | Case<br>s | Age<br>ran<br>ge | Femal<br>e<br>propo<br>rtion |
|-----|---------|-----|-----|------------------------------------------------------------------------------------------------------------------------------------------------------------------------------------------------------------------------------------------------------------------------------------------------------------------------------------------|------------------------------|---------------------------|-------------------|----------------------|------------------------------------------|---------------------------------------|-------------------------------------------------------------------------------------------------------|----------------------|--------------------|-----------|------------------|------------------------------|
|     |         |     |     | Romania, a survey in all urbanized areas of Mexico, and regional surveys in Brazil [Sao Paulo] and Colombia [Medellin]), and 4 in countries classified as low-/lower-middle-income (national surveys in Colombia and Iraq, a survey in all urbanized areas of Peru, and a regional survey in the People's Republic of China [Shenzhen]). |                              |                           |                   |                      |                                          |                                       | IV adult ADHD using the validated form of the Adult ADHD Clinical Diagnostic Scale (ACDS) Version 1.2 |                      |                    |           |                  |                              |
| A91 | Japan   | WPR | HIC | Japan                                                                                                                                                                                                                                                                                                                                    | Comm<br>unity                | Feb<br>2015               | Cross-<br>section | Random<br>sampling   | ASRS-v1.1-<br>6 items                    | DSM-IV,<br>last 6                     | Participants<br>in this study                                                                         | Sympto<br>matic      | 9822               | 602       | 20-<br>69        | 0.5                          |

| ID                      | Country           | WHO  | WB       | Study setting               | Origin<br>s of<br>sampl<br>e | Investi<br>gation<br>Date                   | Study<br>design         | Sampling<br>Strategy                                    | Diagnostic<br>tools for<br>Adult<br>ADHD | Criteria<br>used for<br>diagnosi<br>s | Definition of<br>Adult ADHD                                                                                                        | ADHD<br>Categor<br>y             | Samp<br>le<br>size | Case<br>s | Age<br>ran<br>ge | Femal<br>e<br>propo<br>rtion |
|-------------------------|-------------------|------|----------|-----------------------------|------------------------------|---------------------------------------------|-------------------------|---------------------------------------------------------|------------------------------------------|---------------------------------------|------------------------------------------------------------------------------------------------------------------------------------|----------------------------------|--------------------|-----------|------------------|------------------------------|
| 9]                      |                   |      |          |                             |                              |                                             | al                      |                                                         | screener                                 | months                                | were<br>classified as<br>“possible<br>ADHD” if<br>their ASRS<br>score was 14<br>and “non-<br>ADHD” if the<br>ASRS score<br>was <14 | adult<br>ADHD                    |                    |           |                  |                              |
| A<br>1<br>0[<br>1<br>0] | India             | SEAR | LMI<br>C | A village of<br>south India | Comm<br>unity                | NS                                          | Cross-<br>section<br>al | Cluster<br>sampling                                     | ASRS- 6<br>items<br>screener             | DSM-IV                                | A cut off<br>score of 14<br>on the six-<br>item version<br>were taken as<br>suggestive of<br>ADHD.                                 | Sympto<br>matic<br>adult<br>ADHD | 304                | 78        | 19+              | NS                           |
| A<br>1<br>1[<br>1<br>1] | United<br>Kingdom | EUR  | HIC      | England                     | Comm<br>unity                | Octobe<br>r 2006<br>to Decem<br>ber<br>2007 | Cross-<br>section<br>al | Multistage<br>stratified<br>probabilit<br>y<br>sampling | ASRS- 6<br>items<br>screener             | DSM-IV,<br>previous<br>6 months       | A score of 14<br>and above<br>being used to<br>signify the<br>possible<br>presence of<br>ADHD                                      | Sympto<br>matic<br>adult<br>ADHD | 7268               | 387       | 18-<br>95        | 0.5698<br>95                 |
| A<br>1<br>2[<br>1<br>2] | Brazil            | AMR  | UM<br>IC | Pelotas                     | Comm<br>unity                | 2012                                        | Cohort                  | Stratified<br>sampling                                  | ASRS- 6<br>items<br>screener             | DSM-V,<br>last 6<br>months            | At least 5/9<br>inattention<br>and/or 5/9<br>hyperactivity<br>symptoms +<br>symptom<br>onset before                                | Persiste<br>nt adult<br>ADHD     | 3369               | 70        | 30               | 0.4817<br>45                 |

| ID                      | Country | WHO | WB       | Study setting | Origin<br>s of<br>sampl<br>e | Investi<br>gation<br>Date | Study<br>design | Sampling<br>Strategy | Diagnostic<br>tools for<br>Adult<br>ADHD                                                                                                                                                                                                                           | Criteria<br>used for<br>diagnosi<br>s | Definition of<br>Adult ADHD                                                                                                                                                                                                                                                          | ADHD<br>Categor<br>y         | Samp<br>le<br>size | Case<br>s | Age<br>ran<br>ge | Femal<br>e<br>propo<br>rtion |
|-------------------------|---------|-----|----------|---------------|------------------------------|---------------------------|-----------------|----------------------|--------------------------------------------------------------------------------------------------------------------------------------------------------------------------------------------------------------------------------------------------------------------|---------------------------------------|--------------------------------------------------------------------------------------------------------------------------------------------------------------------------------------------------------------------------------------------------------------------------------------|------------------------------|--------------------|-----------|------------------|------------------------------|
| A<br>1<br>3[<br>1<br>3] | Brazil  | AMR | UM<br>IC | Pelotas       | Comm<br>unity                | 2011-<br>2012             | Cohort          | NS                   | A screening<br>instrument<br>(hyperactivi<br>ty subscale<br>of the<br>Strength<br>and<br>Difficulties<br>Questionnai<br>re)<br>calibrated<br>for a DSM-<br>IV ADHD<br>diagnosis<br>based on<br>clinical<br>interviews<br>with<br>parents<br>using the<br>Developme | DSM-IV                                | age 12 +<br>symptoms in<br>more than<br>one setting +<br>moderate or<br>severe<br>impairment<br>related to<br>ADHD<br>symptoms<br><br>The optimal<br>cutoff for<br>ADHD was<br>estimated to<br>be 8 or more<br>points on the<br>SDQ<br>hyperactivity<br>scale as rated<br>by parents | Persiste<br>nt adult<br>ADHD | 4039               | 492       | 18-<br>19        | 0.5102<br>75                 |

| ID      | Country | WHO | WB   | Study setting                                 | Origin of sample | Investigation Date | Study design    | Sampling Strategy | Diagnostic tools for Adult ADHD             | Criteria used for diagnoses | Definition of Adult ADHD                                                                                                                                                                                                                                                                                                                         | ADHD Category          | Sample size | Cases | Age range       | Female proportion |
|---------|---------|-----|------|-----------------------------------------------|------------------|--------------------|-----------------|-------------------|---------------------------------------------|-----------------------------|--------------------------------------------------------------------------------------------------------------------------------------------------------------------------------------------------------------------------------------------------------------------------------------------------------------------------------------------------|------------------------|-------------|-------|-----------------|-------------------|
| A14[14] | Turkey  | EUR | UMIC | Adnan Menderes University Faculty of Medicine | University       | 2013-2014          | Cross-sectional | NS                | Diagnostic interviews, Adult ADD/ADHD Scale | DSM-IV                      | In the scoring, it is accepted that there is a lack of attention (DE) in the person who received 2 or 3 answers to at least six of the 9 questions in the first section. In the second part, if at least six of the 9 questions were received in 2 or 3 answers, this person has excessive mobility / impulsivity (AH). By gathering the answers | Symptomatic adult ADHD | 577         | 46    | Mean age: 20.42 | 0.518198          |

| ID                      | Country        | WHO | WB  | Study setting               | Origin<br>s of<br>sampl<br>e | Investi<br>gation<br>Date | Study<br>design         | Sampling<br>Strategy              | Diagnostic<br>tools for<br>Adult<br>ADHD                                                                                       | Criteria<br>used for<br>diagnosi<br>s   | Definition of<br>Adult ADHD                                                                                                                                                                                                             | ADHD<br>Categor<br>y             | Samp<br>le<br>size | Case<br>s | Age<br>ran<br>ge | Femal<br>e<br>propo<br>rtion |
|-------------------------|----------------|-----|-----|-----------------------------|------------------------------|---------------------------|-------------------------|-----------------------------------|--------------------------------------------------------------------------------------------------------------------------------|-----------------------------------------|-----------------------------------------------------------------------------------------------------------------------------------------------------------------------------------------------------------------------------------------|----------------------------------|--------------------|-----------|------------------|------------------------------|
| A<br>1<br>5[<br>1<br>5] | Korea          | WPR | HIC | 12 universities<br>of Korea | Univer<br>sity               | NS                        | Cross-<br>section<br>al | Stratified<br>cluster<br>sampling | ASRS-v1.1-<br>6 items<br>screener                                                                                              | DSM-IV,<br>past 6<br>months             | given to the<br>questions in<br>the third<br>section, there<br>are points<br>related to<br>ADD / ADHD<br>Presence of<br>ADHD<br>symptoms in<br>adults was<br>represented<br>by scores of<br>14 and above                                | Sympto<br>matic<br>adult<br>ADHD | 2172               | 164       | 18+              | 0.4820<br>44                 |
| A<br>1<br>6[<br>1<br>6] | New<br>Zealand | WPR | HIC | Dunedin                     | Comm<br>unity                | 1972-<br>2011             | Cohort                  | NS                                | Diagnostic<br>Interview<br>Schedule for<br>Children-<br>Child<br>Version,<br>Private<br>structured<br>diagnostic<br>interviews | DSM-III,<br>DSM-5,<br>past 12<br>months | Symptoms<br>were<br>ascertained<br>using the<br>Diagnostic<br>Interview<br>Schedule for<br>Children-<br>Child Version<br>at ages 11<br>and 13 by a<br>child<br>psychiatrist<br>and at age 15<br>by trained<br>interviewers.<br>Symptoms | Persiste<br>nt adult<br>ADHD     | 951                | 31        | 38               | 0.5047<br>32                 |

| ID                      | Country | WHO | WB  | Study setting | Origin<br>s of<br>sampl<br>e | Investi<br>gation<br>Date                | Study<br>design         | Sampling<br>Strategy    | Diagnostic<br>tools for<br>Adult<br>ADHD | Criteria<br>used for<br>diagnosi<br>s | Definition of<br>Adult ADHD                                                                                                                                                                                                                                | ADHD<br>Categor<br>y             | Samp<br>le<br>size | Case<br>s | Age<br>ran<br>ge | Femal<br>e<br>propo<br>rtion |  |
|-------------------------|---------|-----|-----|---------------|------------------------------|------------------------------------------|-------------------------|-------------------------|------------------------------------------|---------------------------------------|------------------------------------------------------------------------------------------------------------------------------------------------------------------------------------------------------------------------------------------------------------|----------------------------------|--------------------|-----------|------------------|------------------------------|--|
|                         |         |     |     |               |                              |                                          |                         |                         |                                          |                                       | were<br>ascertained<br>when<br>participants<br>were age 38<br>through<br>private<br>structured<br>diagnostic<br>interviews by<br>trained<br>interviewers<br>with mental-<br>health-<br>related<br>tertiary<br>qualifications<br>and clinical<br>experience |                                  |                    |           |                  |                              |  |
| A<br>1<br>7[<br>1<br>7] | Belgium | EUR | HIC | Belgium       | Univer<br>sity               | Septe<br>mber<br>2012<br>to June<br>2014 | Cross-<br>section<br>al | NS                      | ASRS- 6<br>items<br>screener             | DSM-IV,<br>past 6<br>months           | The cut-off<br>score of 14<br>was therefore<br>seen as a<br>possible<br>ADHD<br>diagnosis, 18<br>as a likely<br>ADHD<br>diagnosis                                                                                                                          | Sympto<br>matic<br>adult<br>ADHD | 4921               | 265       | 18-<br>20+       | 0.5519<br>2                  |  |
| A<br>1                  | Canada  | AMR | HIC | Ontario       | Comm<br>unity                | Januar<br>y 2011                         | Cross-<br>section       | Two-stage<br>probabilit | ASRS-v1.1-<br>6 items                    | DSM-IV                                | Positive<br>ADHD                                                                                                                                                                                                                                           | Sympto<br>matic                  | 3929               | 133       | 18+              | 0.5342<br>33                 |  |



| ID                      | Country | WHO | WB       | Study setting                          | Origin<br>s of<br>sampl<br>e | Investi<br>gation<br>Date  | Study<br>design         | Sampling<br>Strategy             | Diagnostic<br>tools for<br>Adult<br>ADHD                                                                        | Criteria<br>used for<br>diagnosi<br>s              | Definition of<br>Adult ADHD                                                                                                                                                                                                                                                                                                                                              | ADHD<br>Categor<br>y         | Samp<br>le<br>size | Case<br>s | Age<br>ran<br>ge | Femal<br>e<br>propo<br>rtion |
|-------------------------|---------|-----|----------|----------------------------------------|------------------------------|----------------------------|-------------------------|----------------------------------|-----------------------------------------------------------------------------------------------------------------|----------------------------------------------------|--------------------------------------------------------------------------------------------------------------------------------------------------------------------------------------------------------------------------------------------------------------------------------------------------------------------------------------------------------------------------|------------------------------|--------------------|-----------|------------------|------------------------------|
| 8[<br>1<br>8]           |         |     |          |                                        |                              | to<br>Decem<br>ber<br>2012 | al                      | y<br>sampling                    | screeener                                                                                                       |                                                    | symptoms<br>screen is a<br>total score<br>greater than<br>13                                                                                                                                                                                                                                                                                                             | adult<br>ADHD                |                    |           |                  |                              |
| A<br>1<br>9[<br>1<br>9] | Iran    | EMR | UM<br>IC | Urban Tabriz,<br>North-West of<br>Iran | Comm<br>unity                | 2009                       | Cross-<br>section<br>al | Two-stage<br>cluster<br>sampling | Conner's<br>Adult ADHD<br>Rating Scale<br>(CAARS), K-<br>SADS<br>questionnai<br>re,<br>psychiatric<br>interview | DSM-IV-<br>TR<br>criteria<br>and<br>Wender<br>Utah | The subjects<br>with ADHD<br>index higher<br>than 70 in the<br>self-report<br>questionnaire<br>of Conner's<br>Adult ADHD<br>Rating Scale<br>were initially<br>evaluated for<br>childhood<br>ADHD<br>symptoms;<br>and if<br>positive, the<br>ADHD<br>portion of K-<br>SADS<br>questionnaire<br>about<br>childhood<br>was fulfilled;<br>and if<br>certified by<br>one more | Persiste<br>nt adult<br>ADHD | 400                | 15        | 18-<br>50        | 0.5                          |

| ID                | Country | WHO | WB  | Study setting                                | Origin<br>s of<br>sampl<br>e | Investi<br>gation<br>Date    | Study<br>design         | Sampling<br>Strategy | Diagnostic<br>tools for<br>Adult<br>ADHD | Criteria<br>used for<br>diagnosi<br>s | Definition of<br>Adult ADHD                                                                                                                                                                                                                                                                                                                                   | ADHD<br>Categor<br>y             | Samp<br>le<br>size | Case<br>s | Age<br>ran<br>ge | Femal<br>e<br>propo<br>rtion |
|-------------------|---------|-----|-----|----------------------------------------------|------------------------------|------------------------------|-------------------------|----------------------|------------------------------------------|---------------------------------------|---------------------------------------------------------------------------------------------------------------------------------------------------------------------------------------------------------------------------------------------------------------------------------------------------------------------------------------------------------------|----------------------------------|--------------------|-----------|------------------|------------------------------|
| A<br>2<br>0[<br>2 | France  | EUR | HIC | 20<br>kindergarten<br>schools, 30<br>primary | Comm<br>unity                | Spring<br>2010<br>to<br>2011 | Cross-<br>section<br>al | NS                   | ASRS - 6<br>items<br>screener            | DSM-IV                                | family<br>member<br>knowing<br>about his/her<br>childhood,<br>the subject<br>was selected.<br>Then, the<br>psychiatric<br>interview<br>was<br>performed<br>for all<br>selected<br>individuals<br>according to<br>the DSM-IV-<br>TR criteria<br>and Wender<br>Utah; and<br>those who<br>had definite<br>symptoms<br>were<br>diagnosed to<br>have adult<br>ADHD | Sympto<br>matic<br>adult<br>ADHD | 1171               | 131       | 20-<br>64        | 0.5644<br>75                 |

| ID                      | Country         | WHO | WB  | Study setting                                                                                                                                                                        | Origin<br>s of<br>sampl<br>e | Investi<br>gation<br>Date               | Study<br>design         | Sampling<br>Strategy                                  | Diagnostic<br>tools for<br>Adult<br>ADHD                                           | Criteria<br>used for<br>diagnosi<br>s | Definition of<br>Adult ADHD                                                                                                                                               | ADHD<br>Categor<br>y             | Samp<br>le<br>size | Case<br>s | Age<br>ran<br>ge | Femal<br>e<br>propo<br>rtion |
|-------------------------|-----------------|-----|-----|--------------------------------------------------------------------------------------------------------------------------------------------------------------------------------------|------------------------------|-----------------------------------------|-------------------------|-------------------------------------------------------|------------------------------------------------------------------------------------|---------------------------------------|---------------------------------------------------------------------------------------------------------------------------------------------------------------------------|----------------------------------|--------------------|-----------|------------------|------------------------------|
| 0]                      |                 |     |     | schools , and<br>14 secondary<br>schools from<br>Southern<br>France                                                                                                                  |                              |                                         |                         |                                                       |                                                                                    |                                       | 10 are<br>considered as<br>very likely to<br>have ADHD                                                                                                                    |                                  |                    |           |                  |                              |
| A<br>2<br>1[<br>2<br>1] | Switzerl<br>and | EUR | HIC | Three of a total<br>of six centres<br>that recruit<br>men for<br>military<br>service,<br>covering 21 of<br>26 Swiss<br>cantons<br>(including all<br>French-<br>speaking<br>cantons). | Comm<br>unity                | August<br>2010-<br>Novem<br>ber<br>2011 | Cohort                  | NS                                                    | ASRS-v1.1-<br>6 items<br>screener                                                  | DSM-IV,<br>last 12<br>months          | The answers<br>then were<br>dichotomized<br>into the<br>variable “no<br>ADHD”<br>(scores 0–13)<br>and “ADHD”<br>(scores 14–<br>24)                                        | Sympto<br>matic<br>adult<br>ADHD | 5656               | 226       | 17-<br>28        | 0                            |
| A<br>2<br>2[<br>2<br>2] | Netherla<br>nds | EUR | HIC | NS                                                                                                                                                                                   | Comm<br>unity                | NS                                      | Cross-<br>section<br>al | Stratified,<br>multi-<br>stage,<br>random<br>sampling | Composite<br>Internation<br>al<br>Diagnostic<br>Interview<br>(CIDI)<br>version 3.0 | DSM-IV                                | CIDI 3.0 asks<br>about<br>symptoms of<br>ADHD in<br>childhood<br>and about the<br>burden the<br>respondent<br>has<br>experienced.<br>The answers<br>reveal<br>whether the | Persiste<br>nt adult<br>ADHD     | 3305               | 55        | 18-<br>44        | 0.4965                       |

| ID                      | Country | WHO | WB  | Study setting                                                                                                                                                                        | Origin<br>s of<br>sampl<br>e | Investi<br>gation<br>Date | Study<br>design | Sampling<br>Strategy | Diagnostic<br>tools for<br>Adult<br>ADHD                                   | Criteria<br>used for<br>diagnosi<br>s | Definition of<br>Adult ADHD                                                                                                                                                                                                                                                                                                                                                                                                                 | ADHD<br>Categor<br>y         | Samp<br>le<br>size | Case<br>s | Age<br>ran<br>ge | Femal<br>e<br>propo<br>rtion |
|-------------------------|---------|-----|-----|--------------------------------------------------------------------------------------------------------------------------------------------------------------------------------------|------------------------------|---------------------------|-----------------|----------------------|----------------------------------------------------------------------------|---------------------------------------|---------------------------------------------------------------------------------------------------------------------------------------------------------------------------------------------------------------------------------------------------------------------------------------------------------------------------------------------------------------------------------------------------------------------------------------------|------------------------------|--------------------|-----------|------------------|------------------------------|
| A<br>2<br>3[<br>2<br>3] | USA     | AMR | HIC | Households<br>and group<br>quarters (such<br>as college halls<br>of residents,<br>barracks,<br>residential<br>treatment<br>centres) in the<br>USA, including<br>Alaska and<br>Hawaii | Comm<br>unity                | 2004-<br>2005             | Cohort          | NS                   | Self-<br>reported<br>screening<br>for ADHD in<br>adulthood/<br>adolescence | DSM-IV-<br>TR, last 6<br>months       | person meets<br>the DSM-IV<br>criteria for<br>ADHD in<br>childhood<br>and early<br>adolescence.<br>In addition,<br>those with<br>ADHD in<br>childhood<br>were asked if<br>the ADHD<br>symptoms<br>were still<br>present in the<br>past year.<br><br>For the<br>diagnosis of<br>ADHD, six or<br>more<br>inattention<br>and/or<br>impulsive-<br>hyperactive<br>symptoms<br>had to be<br>present for at<br>least 6<br>months<br>(criterion A), | Persiste<br>nt adult<br>ADHD | 3465<br>3          | 340       | 18+              | 0.521                        |

| ID                | Country | WHO | WB       | Study setting                                   | Origin<br>s of<br>sampl<br>e | Investi<br>gation<br>Date | Study<br>design         | Sampling<br>Strategy | Diagnostic<br>tools for<br>Adult<br>ADHD   | Criteria<br>used for<br>diagnosi<br>s | Definition of<br>Adult ADHD                                                                                                                                                                                                                                                                                                                                                         | ADHD<br>Categor<br>y           | Samp<br>le<br>size | Case<br>s                 | Age<br>ran<br>ge        | Femal<br>e<br>propo<br>rtion |
|-------------------|---------|-----|----------|-------------------------------------------------|------------------------------|---------------------------|-------------------------|----------------------|--------------------------------------------|---------------------------------------|-------------------------------------------------------------------------------------------------------------------------------------------------------------------------------------------------------------------------------------------------------------------------------------------------------------------------------------------------------------------------------------|--------------------------------|--------------------|---------------------------|-------------------------|------------------------------|
| A<br>2<br>4[<br>2 | Iran    | EMR | UM<br>IC | Hamadan<br>University of<br>Medical<br>Sciences | Univer<br>sity               | NS                        | Cross-<br>section<br>al | NS                   | ASRS-v1.1-<br>6 items<br>screeener<br>(and | DSM-IV-<br>TR                         | be associated<br>with<br>impairment<br>in two or<br>more settings<br>(criterion C)<br>and interfere<br>significantly<br>with social,<br>school or<br>work<br>functioning<br>(criterion D).<br>Symptoms<br>had to be<br>present<br>before the<br>age of 12.<br>Persistent<br>ADHD was<br>defined by<br>the current<br>presence of<br>the<br>aforementio<br>ned criteria at<br>Wave 2 | Both<br>sympto<br>matic<br>and | 387                | 64<br>(adul<br>thoo<br>d) | Me<br>an<br>age:<br>19. | 0.66                         |

| ID      | Country   | WHO | WB   | Study setting                                                                       | Origin of sample | Investigation Date      | Study design    | Sampling Strategy           | Diagnostic tools for Adult ADHD  | Criteria used for diagnoses | Definition of Adult ADHD                                                                                                                       | ADHD Category          | Sample size | Cases                                 | Age range | Female proportion |
|---------|-----------|-----|------|-------------------------------------------------------------------------------------|------------------|-------------------------|-----------------|-----------------------------|----------------------------------|-----------------------------|------------------------------------------------------------------------------------------------------------------------------------------------|------------------------|-------------|---------------------------------------|-----------|-------------------|
| 4]      |           |     |      | (Hamadan, Islamic Republic of Iran)                                                 |                  |                         |                 |                             | Wender Utah Rating Scale [WURS]] |                             | the first three items be present at least “sometimes” and the next three to be present “often” to qualify for a screen positive status of ADHD | persistent adult ADHD  |             | and 52 (both childhood and adulthood) | 6         |                   |
| A25[25] | Iraq      | EMR | UMIC | Department of Pharmacology, University of Al-Mustansiriya                           | University       | March 2011 to June 2011 | Cross-sectional | Stratified cluster sampling | ASRS- 6 items screener           | DSM, last 6 months          | Participants for whom total scores for these 6 items were 14 or higher, were considered ADHD positive                                          | Symptomatic adult ADHD | 361         | 60                                    | 18-25     | 0.412742          |
| A26[26] | Australia | WPR | HIC  | The city of Canberra and the adjacent town of Queanbeyan in south-eastern Australia | Community        | 2007-2010               | Cohort          | NS                          | ASRS- 6 items screener           | DSM-IV-TR, last 6 months    | Scores 14–24 being indicative of possible ADHD                                                                                                 | Symptomatic adult ADHD | 2092        | 129                                   | 47-54     | 0.525335          |

| ID                      | Country     | WHO | WB       | Study setting                                           | Origin<br>s of<br>sampl<br>e | Investi<br>gation<br>Date | Study<br>design         | Sampling<br>Strategy         | Diagnostic<br>tools for<br>Adult<br>ADHD                                               | Criteria<br>used for<br>diagnosi<br>s | Definition of<br>Adult ADHD                                                                                                                                                                                                                                                                                                                                                                            | ADHD<br>Categor<br>y             | Samp<br>le<br>size | Case<br>s | Age<br>ran<br>ge | Femal<br>e<br>propo<br>rtion |
|-------------------------|-------------|-----|----------|---------------------------------------------------------|------------------------------|---------------------------|-------------------------|------------------------------|----------------------------------------------------------------------------------------|---------------------------------------|--------------------------------------------------------------------------------------------------------------------------------------------------------------------------------------------------------------------------------------------------------------------------------------------------------------------------------------------------------------------------------------------------------|----------------------------------|--------------------|-----------|------------------|------------------------------|
| A<br>2<br>7[<br>2<br>7] | German<br>y | EUR | HIC      | Representative<br>areas of<br>Germany                   | Comm<br>unity                | 2002-<br>2003             | Cross-<br>section<br>al | Random<br>sampling           | Wender<br>Utah Rating<br>Scale<br>(WURS-k),<br>ADHD self-<br>rating scale<br>(ADHD-SR) | DSM-IV-<br>TR                         | A cut off<br>score of >=30<br>to indicate<br>the presence<br>of a diagnosis<br>of ADHD in<br>childhood.<br>The<br>recommende<br>d cut-off<br>score of >=15<br>was used to<br>indicate that<br>participants<br>met criteria<br>for adult<br>ADHD. Only<br>participants<br>who fulfilled<br>both the<br>WURS-k<br>criteria and<br>the ADHD-SR<br>criteria were<br>diagnosed as<br>cases of adult<br>ADHD | Persiste<br>nt adult<br>ADHD     | 1655               | 78        | 18-<br>64        | 0.5510<br>57                 |
| A<br>7_<br>b[<br>2      | Turkey      | EUR | UM<br>IC | Cumhuriyet<br>University<br>(CU), located<br>in central | Univer<br>sity               | NS                        | Cross-<br>section<br>al | Simple<br>random<br>sampling | ASRS- 18<br>items<br>screener                                                          | DSM-IV                                | 1.5 SD abo ve<br>the mean-<br>score of 40                                                                                                                                                                                                                                                                                                                                                              | Sympto<br>matic<br>adult<br>ADHD | 980                | 48        | 17-<br>44        | 0.441                        |

| ID      | Country     | WHO | WB  | Study setting                                                                         | Origins of sample | Investigation Date | Study design | Sampling Strategy                                     | Diagnostic tools for Adult ADHD                                                                                                                                                                                                                                         | Criteria used for diagnosis | Definition of Adult ADHD                                                                                                                                                                                                                               | ADHD Category         | Sample size | Cases | Age range | Female proportion |
|---------|-------------|-----|-----|---------------------------------------------------------------------------------------|-------------------|--------------------|--------------|-------------------------------------------------------|-------------------------------------------------------------------------------------------------------------------------------------------------------------------------------------------------------------------------------------------------------------------------|-----------------------------|--------------------------------------------------------------------------------------------------------------------------------------------------------------------------------------------------------------------------------------------------------|-----------------------|-------------|-------|-----------|-------------------|
| 8]      |             |     |     | Anatolia in Turkey                                                                    |                   |                    |              |                                                       |                                                                                                                                                                                                                                                                         |                             |                                                                                                                                                                                                                                                        |                       |             |       |           |                   |
| A28[29] | Netherlands | EUR | HIC | Population registries of 11 municipalities in 3 geographical areas of The Netherlands | Community         | 2008-2009          | Cohort       | Two-phase non-proportional stratified random sampling | Attention-deficit hyperactivity disorder was screened using a questionnaire developed by Barkley et al (Barkley RA, Murphy KR, Fischer M. ADHD in Adults: What the Science Says. Guilford, 2007); To diagnose ADHD, the Diagnostic Interview for ADHD in Adults, second | DSM-IV-TR, last 6 months    | Symptomatic ADHD required the cut-off score of four symptoms or more of either inattention and/or hyperactivity -impulsivity during the 6 months prior to the interview and >=6 symptoms of inattention and/or hyperactivity -impulsivity in childhood | Persistent adult ADHD | 231         | 23    | 60-94     | 0.59              |



| ID      | Country | WHO | WB  | Study setting                                                                                              | Origin of sample | Investigation Date                 | Study design    | Sampling Strategy | Diagnostic tools for Adult ADHD                                     | Criteria used for diagnoses | Definition of Adult ADHD                                                                                                                                                                                                                                                 | ADHD Category         | Sample size | Cases | Age range | Female proportion |
|---------|---------|-----|-----|------------------------------------------------------------------------------------------------------------|------------------|------------------------------------|-----------------|-------------------|---------------------------------------------------------------------|-----------------------------|--------------------------------------------------------------------------------------------------------------------------------------------------------------------------------------------------------------------------------------------------------------------------|-----------------------|-------------|-------|-----------|-------------------|
| A29[30] | Germany | EUR | HIC | The area of Germany was separated into 258 sample areas representing the different regions of the country. | Community        | November 27 2009-December 16, 2009 | Cross-sectional | NS                | Wender Utah Rating Scale (WURS-k), ADHD self-rating scale (ADHD-SR) | DSM-IV                      | A cut off score of >=30 to indicate the presence of a diagnosis of ADHD in childhood. The recommended cut-off score of >=15 was used to indicate that participants met criteria for adult ADHD. Only participants who fulfilled both the WURS-k criteria and the ADHD-SR | Persistent adult ADHD | 1633        | 77    | 18-64     | 0.536             |

| ID      | Country | WHO | WB  | Study setting | Origin of sample | Investigation Date | Study design    | Sampling Strategy                         | Diagnostic tools for Adult ADHD | Criteria used for diagnoses | Definition of Adult ADHD                                                                                                                                                                                                                                                                                                                  | ADHD Category         | Sample size | Cases | Age range | Female proportion |
|---------|---------|-----|-----|---------------|------------------|--------------------|-----------------|-------------------------------------------|---------------------------------|-----------------------------|-------------------------------------------------------------------------------------------------------------------------------------------------------------------------------------------------------------------------------------------------------------------------------------------------------------------------------------------|-----------------------|-------------|-------|-----------|-------------------|
| A30[31] | Korea   | WPR | HIC | Korea         | Community        | 2006-2007          | Cross-sectional | Stratified, multi-stage, cluster sampling | ASRS-v1.1-6 items screener      | DSM-IV, last 6 months       | criteria were diagnosed as probable cases of adult ADHD<br><br>A dichotomous version of the six-question ASRS-v1.1 Screener, wherein scores of 4 and above were considered consistent with adult ADHD. In addition to obtaining self-reported symptom frequencies, the interviewer confirmed the persistence of at least one symptom from | Persistent adult ADHD | 6081        | 69    | 18-59     | 0.495             |

| ID      | Country | WHO | WB   | Study setting                                                                                          | Origins of sample | Investigation Date         | Study design    | Sampling Strategy | Diagnostic tools for Adult ADHD             | Criteria used for diagnoses | Definition of Adult ADHD                                                                                                                                                                       | ADHD Category          | Sample size | Cases | Age range       | Female proportion |
|---------|---------|-----|------|--------------------------------------------------------------------------------------------------------|-------------------|----------------------------|-----------------|-------------------|---------------------------------------------|-----------------------------|------------------------------------------------------------------------------------------------------------------------------------------------------------------------------------------------|------------------------|-------------|-------|-----------------|-------------------|
| A31[32] | Turkey  | EUR | UMIC | Gazi University Department of Nursing                                                                  | University        | 2006-2007                  | Cross-sectional | Cluster sampling  | Wender Utah Rating Scale (WURS), ADHD scale | DSM-IV                      | childhood<br>WURS >=36;<br>If 2 or 3 answers are given to at least six of the 9 questions in the first part of the scoring, attention deficit disorder is diagnosed.                           | Persistent adult ADHD  | 196         | 15    | Mean age: 20.16 | NS                |
| A32[33] | Kenya   | AFR | LMIC | The study was carried out at the Town Campus of Moi University. The campus is located in Eldoret town. | University        | March 2009 to October 2009 | Cohort          | Cluster sampling  | ASRS-v1.1-18 items screener                 | DSM-IV-TR, last 6 months    | To meet the criteria for possible ADHD, at least six of either the inattentive symptoms (Questions 1-4 and 7-11 on the ASRS checklist) or the hyperactivity/impulsivity symptoms (Questions 5, | Symptomatic adult ADHD | 458         | 42    | 17-46           | 0.485             |

| ID     | Country | WHO | WB   | Study setting                          | Origin of sample | Investigation Date | Study design    | Sampling Strategy   | Diagnostic tools for Adult ADHD | Criteria used for diagnoses | Definition of Adult ADHD                                                                                                                                                                                                                                                                                                | ADHD Category          | Sample size | Cases | Age range | Female proportion |
|--------|---------|-----|------|----------------------------------------|------------------|--------------------|-----------------|---------------------|---------------------------------|-----------------------------|-------------------------------------------------------------------------------------------------------------------------------------------------------------------------------------------------------------------------------------------------------------------------------------------------------------------------|------------------------|-------------|-------|-----------|-------------------|
| A3334] | USA     | AMR | HIC  | A large public mid-Atlantic university | University       | 2007-2008          | Cohort          | Cluster sampling    | ASRS- 18 items screener         | DSM-IV                      | 6 and 12-18 on the ASRS checklist) had to be positive on the full ASRS symptom checklist<br><br>Scores of 0–3 and 4–8 denoted “low” and “moderate” ADHD symptoms, respectively, and a score of 9 or higher fell into the “clinical” range, indicating the participant might benefit from a clinical assessment for ADHD | Symptomatic adult ADHD | 1080        | 108   | 21-23     | 0.538             |
| A34]   | Brazil  | AMR | UMIC | 143 counties selected from Brazil      | Community        | November 2005-     | Cross-sectional | Three-stage cluster | ASRS-6 items screener           | DSM-IV                      | A positive screening in the ASRS                                                                                                                                                                                                                                                                                        | Symptomatic adult      | 3007        | 174   | 18+       | NS                |

| ID           | Country | WHO | WB       | Study setting            | Origin<br>s of<br>sampl<br>e | Investi<br>gation<br>Date | Study<br>design         | Sampling<br>Strategy                          | Diagnostic<br>tools for<br>Adult<br>ADHD                | Criteria<br>used for<br>diagnosi<br>s | Definition of<br>Adult ADHD                                                                                                                                                                                                                       | ADHD<br>Categor<br>y             | Samp<br>le<br>size | Case<br>s | Age<br>ran<br>ge              | Femal<br>e<br>propo<br>rtion |
|--------------|---------|-----|----------|--------------------------|------------------------------|---------------------------|-------------------------|-----------------------------------------------|---------------------------------------------------------|---------------------------------------|---------------------------------------------------------------------------------------------------------------------------------------------------------------------------------------------------------------------------------------------------|----------------------------------|--------------------|-----------|-------------------------------|------------------------------|
| 35]          |         |     |          |                          |                              | April<br>2006             |                         | sampling                                      |                                                         |                                       | Screeener was<br>defined as a<br>score of 14 or<br>higher                                                                                                                                                                                         | ADHD                             |                    |           |                               |                              |
| A7-<br>c[36] | Turkey  | EUR | UM<br>IC | Dumlupinar<br>university | Univer<br>sity               | NS                        | Cross-<br>section<br>al | Cluster<br>sampling                           | Adult ADHD<br>Scale- 18<br>items<br>screeener           | DSM-IV                                | In general,<br>those with a<br>score below<br>20 show low<br>levels of<br>ADHD, those<br>with a score<br>between 20-<br>59 indicate<br>moderate<br>levels of<br>ADHD, and<br>those with a<br>score above<br>59 indicate<br>high levels of<br>ADHD | Sympto<br>matic<br>adult<br>ADHD | 1961               | 305       | Me<br>an<br>age:<br>18.<br>97 | 0.634                        |
| A35[37]      | USA     | AMR | HIC      | NS                       | Comm<br>unity                | 2001-<br>2003             | Cross-<br>section<br>al | Four-<br>stage<br>probabilit<br>y<br>sampling | Adult ADHD<br>Clinical<br>Diagnostic<br>Scale<br>(ACDS) | DSM-IV,<br>last 6<br>months           | Respondents<br>were<br>diagnosed<br>with adult<br>ADHD if they<br>endorsed six<br>or more<br>symptoms of<br>either<br>inattention or                                                                                                              | Persiste<br>nt adult<br>ADHD     | 6737               | 243       | 18-<br>44                     | 0.516                        |

| ID      | Country                                    | WHO           | WB        | Study setting | Origin<br>s of<br>sampl<br>e | Investi<br>gation<br>Date | Study<br>design | Sampling<br>Strategy                                 | Diagnostic<br>tools for<br>Adult<br>ADHD          | Criteria<br>used for<br>diagnosi<br>s | Definition of<br>Adult ADHD                                                                                                                                                                                                                                                                            | ADHD<br>Categor<br>y  | Samp<br>le<br>size | Case<br>s | Age<br>ran<br>ge | Femal<br>e<br>propo<br>rtion |
|---------|--------------------------------------------|---------------|-----------|---------------|------------------------------|---------------------------|-----------------|------------------------------------------------------|---------------------------------------------------|---------------------------------------|--------------------------------------------------------------------------------------------------------------------------------------------------------------------------------------------------------------------------------------------------------------------------------------------------------|-----------------------|--------------------|-----------|------------------|------------------------------|
|         |                                            |               |           |               |                              |                           |                 |                                                      |                                                   |                                       | hyperactivity within the last six months (DSM-IV Criterion A), two or more Criterion A symptoms before age seven (Criterion B), impairment in two or more areas of living within the past six months (Criterion C), and clinically significant impairment in at least one of these areas (Criterion D) |                       |                    |           |                  |                              |
| A36[38] | Belgium, Colombia, France, Germany, Italy, | EUR, EMR, AMR | HIC, LMIC | NS            | Community                    | 2001-2003                 | Cross-sectional | Stratified multistage clustered probability sampling | Adult ADHD Clinical Diagnostic Scale (ACDS) V 1.2 | DSM-IV, last 6 months                 | A clinical diagnosis of adult ADHD required six symptoms of either                                                                                                                                                                                                                                     | Persistent adult ADHD | 11422              | 388       | 18-44            | NS                           |

| ID | Country                                                                | WHO | WB | Study setting | Origin<br>s of<br>sampl<br>e | Investi<br>gation<br>Date | Study<br>design | Sampling<br>Strategy | Diagnostic<br>tools for<br>Adult<br>ADHD | Criteria<br>used for<br>diagnosi<br>s | Definition of<br>Adult ADHD                                                                                                                                                                                                                                                                                                                                                                                                                                      | ADHD<br>Categor<br>y | Samp<br>le<br>size | Case<br>s | Age<br>ran<br>ge | Femal<br>e<br>propo<br>rtion |  |
|----|------------------------------------------------------------------------|-----|----|---------------|------------------------------|---------------------------|-----------------|----------------------|------------------------------------------|---------------------------------------|------------------------------------------------------------------------------------------------------------------------------------------------------------------------------------------------------------------------------------------------------------------------------------------------------------------------------------------------------------------------------------------------------------------------------------------------------------------|----------------------|--------------------|-----------|------------------|------------------------------|--|
|    | Lebanon<br>, Mexico,<br>Netherla<br>nds,<br>Spain,<br>United<br>States |     |    |               |                              |                           |                 |                      |                                          |                                       | inattention or<br>hyperactivity<br>-impulsivity<br>during the 6<br>months<br>before the<br>interview<br>(DSM-IV<br>criterion A;<br>American<br>Psychiatric<br>Associa-tion,<br>1994), at<br>least two<br>criterion A<br>symptoms<br>before age 7<br>years<br>(criterion B),<br>some<br>impairment<br>in at least two<br>areas of living<br>during the<br>previous 6<br>months<br>(criterion C)<br>and clinically<br>significant<br>impairment<br>in at least one |                      |                    |           |                  |                              |  |

| ID                      | Country | WHO | WB  | Study setting                                                                                                                                                              | Origin<br>s of<br>sampl<br>e | Investi<br>gation<br>Date | Study<br>design         | Sampling<br>Strategy | Diagnostic<br>tools for<br>Adult<br>ADHD | Criteria<br>used for<br>diagnosi<br>s | Definition of<br>Adult ADHD                                                                                                                                                                                                                                                                                                                                                                                                                                                                   | ADHD<br>Categor<br>y         | Samp<br>le<br>size | Case<br>s | Age<br>ran<br>ge | Femal<br>e<br>propo<br>rtion |
|-------------------------|---------|-----|-----|----------------------------------------------------------------------------------------------------------------------------------------------------------------------------|------------------------------|---------------------------|-------------------------|----------------------|------------------------------------------|---------------------------------------|-----------------------------------------------------------------------------------------------------------------------------------------------------------------------------------------------------------------------------------------------------------------------------------------------------------------------------------------------------------------------------------------------------------------------------------------------------------------------------------------------|------------------------------|--------------------|-----------|------------------|------------------------------|
| A<br>3<br>7[<br>3<br>9] | USA     | AMR | HIC | New England,<br>mid-atlantic,<br>east north<br>central, west<br>north central,<br>south atlantic,<br>east south<br>central, west<br>south central,<br>mountain,<br>pacific | Comm<br>unity                | NS                        | Cross-<br>section<br>al | Random<br>sampling   | NS                                       | DSM-IV                                | of these areas<br>(criterion D).<br>No attempt<br>was made to<br>operationalis<br>e DSM-IV<br>diagnostic<br>hierarchy<br>rules<br>(criterion E).<br>We classified<br>participants<br>as positive for<br>inattentive<br>ADHD in<br>childhood if<br>six of the nine<br>inattentive<br>items were<br>positive and<br>less than six<br>hyperactive-<br>impulsive<br>symptoms<br>were positive.<br>We classified<br>participants<br>as positive for<br>hyperactive-<br>impulsive<br>ADHD if six of | Persiste<br>nt adult<br>ADHD | 966                | 28        | NS               | 0.52                         |



| ID                      | Country         | WHO | WB  | Study setting | Origin<br>s of<br>sampl<br>e | Investi<br>gation<br>Date               | Study<br>design         | Sampling<br>Strategy        | Diagnostic<br>tools for<br>Adult<br>ADHD | Criteria<br>used for<br>diagnosi<br>s | Definition of<br>Adult ADHD                                                                                                                                                                                                                                                                                                                                                                                                                                    | ADHD<br>Categor<br>y         | Samp<br>le<br>size | Case<br>s | Age<br>ran<br>ge | Femal<br>e<br>propo<br>rtion |
|-------------------------|-----------------|-----|-----|---------------|------------------------------|-----------------------------------------|-------------------------|-----------------------------|------------------------------------------|---------------------------------------|----------------------------------------------------------------------------------------------------------------------------------------------------------------------------------------------------------------------------------------------------------------------------------------------------------------------------------------------------------------------------------------------------------------------------------------------------------------|------------------------------|--------------------|-----------|------------------|------------------------------|
| A<br>3<br>8[<br>4<br>0] | Netherla<br>nds | EUR | HIC | Nijmegen      | Comm<br>unity                | Septe<br>mber<br>1997-<br>March<br>1998 | Cross-<br>section<br>al | Probabilit<br>y<br>sampling | ADHD DSM-<br>IV rating<br>scale          | DSM-IV,<br>last 6<br>months           | the nine<br>hyperactive-<br>impulsive<br>items were<br>positive and<br>less than six<br>inattentive<br>symptoms<br>were positive.<br>We classified<br>participants<br>as combined<br>type if six of<br>the nine<br>inattentive<br>items were<br>positive and<br>six of the nine<br>hyperactive-<br>impulsive<br>items were<br>positive<br>The self-<br>report<br>questionnaire<br>consisted of<br>26 items in<br>total, with 23<br>items on<br>current<br>ADHD | Persiste<br>nt adult<br>ADHD | 1813               | 45        | 18-<br>75        | 0.553                        |

| ID | Country | WHO | WB | Study setting | Origin<br>s of<br>sampl<br>e | Investi<br>gation<br>Date | Study<br>design | Sampling<br>Strategy | Diagnostic<br>tools for<br>Adult<br>ADHD | Criteria<br>used for<br>diagnosi<br>s | Definition of<br>Adult ADHD                                                                                                                                                                                                                                                                                                                                                            | ADHD<br>Categor<br>y | Samp<br>le<br>size | Case<br>s | Age<br>ran<br>ge | Femal<br>e<br>propo<br>rtion |
|----|---------|-----|----|---------------|------------------------------|---------------------------|-----------------|----------------------|------------------------------------------|---------------------------------------|----------------------------------------------------------------------------------------------------------------------------------------------------------------------------------------------------------------------------------------------------------------------------------------------------------------------------------------------------------------------------------------|----------------------|--------------------|-----------|------------------|------------------------------|
|    |         |     |    |               |                              |                           |                 |                      |                                          |                                       | <p>symptoms and three childhood items. A symptom was considered as present if the answer given to the item was 'often' or 'very often' (score of 2 or 3), using a cutoff of six and four current symptoms. For childhood symptoms a score 'often' or 'very often' on all three items was considered clinically relevant and taken as an index of the presence of ADHD in childhood</p> |                      |                    |           |                  |                              |



**Table S5. Quality scores for assessing the quality of the included articles (n=40)**

| ID      | Author                               | Year Published | Quality score     |             |               |                    |                    |              |
|---------|--------------------------------------|----------------|-------------------|-------------|---------------|--------------------|--------------------|--------------|
|         |                                      |                | Sample population | Sample size | Participation | Outcome assessment | Analytical methods | Total scores |
| A1[1]   | Vigdis Elin Giaever Syrstada, et al. | 2019           | 1                 | 1           | 0             | 2                  | 2                  | 6            |
| A2[2]   | Kosuke Kajitani, et al.              | 2019           | 0                 | 0           | 2             | 2                  | 2                  | 6            |
| A3[3]   | Paulo Mattos, et al.                 | 2018           | 0                 | 1           | 2             | 2                  | 1                  | 6            |
| A4[4]   | Flore Moulin, et al.                 | 2018           | 2                 | 1           | 0             | 2                  | 2                  | 7            |
| A5[5]   | Lucia Romo, et al.                   | 2018           | 2                 | 1           | 2             | 2                  | 1                  | 8            |
| A6[6]   | Meng Shi, et al.                     | 2018           | 1                 | 1           | 2             | 2                  | 1                  | 7            |
| A7_a[7] | Etem Erdal Ersan                     | 2017           | 1                 | 1           | 2             | 2                  | 1                  | 7            |
| A8[8]   | John Fayyad, et al.                  | 2017           | 1                 | 1           | 0             | 2                  | 2                  | 6            |
| A9[9]   | Wakako Ito, et al.                   | 2017           | 1                 | 1           | 0             | 2                  | 2                  | 6            |
| A10[10] | Manoj Kumar, et al.                  | 2017           | 0                 | 1           | 0             | 2                  | 1                  | 4            |
| A11[11] | A.Stickleya, et al.                  | 2017           | 2                 | 1           | 0             | 2                  | 2                  | 7            |
| A12[12] | E. S. Vitola, et al.                 | 2017           | 2                 | 1           | 2             | 2                  | 2                  | 9            |
| A13[13] | ArthurCaye, et al.                   | 2016           | 2                 | 1           | 1             | 2                  | 1                  | 7            |
| A14[14] | Filiz Özdemirođlu, et al.            | 2016           | 0                 | 0           | 0             | 2                  | 1                  | 3            |
| A15[15] | Young-sook Kwak, et al.              | 2015           | 1                 | 1           | 1             | 2                  | 2                  | 7            |
| A16[16] | Terrie E. Moffitt, et al.            | 2015           | 2                 | 1           | 2             | 2                  | 2                  | 9            |
| A17[17] | P.MORTIER, et al.                    | 2015           | 1                 | 1           | 0             | 2                  | 1                  | 5            |
| A18[18] | EvelynVingilis, et al.               | 2015           | 2                 | 1           | 0             | 2                  | 2                  | 7            |

| ID       | Author                        | Year Published | Quality score     |             |               |                    |                    |              |
|----------|-------------------------------|----------------|-------------------|-------------|---------------|--------------------|--------------------|--------------|
|          |                               |                | Sample population | Sample size | Participation | Outcome assessment | Analytical methods | Total scores |
| 8]       |                               |                |                   |             |               |                    |                    |              |
| A19[19]  | Shahrokh Amiri, et al.        | 2014           | 1                 | 1           | 0             | 2                  | 1                  | 5            |
| A20[20]  | Alexandre J. S. MORIN, et al. | 2014           | 1                 | 1           | 0             | 2                  | 2                  | 6            |
| A21[21]  | Estévez N, et al.             | 2014           | 2                 | 1           | 1             | 2                  | 2                  | 8            |
| A22[22]  | Tuithof M, et al.             | 2014           | 2                 | 1           | 0             | 2                  | 2                  | 7            |
| A23[23]  | Cortese S, et al.             | 2013           | 2                 | 1           | 2             | 2                  | 2                  | 9            |
| A24[24]  | Jahangard L, et al.           | 2013           | 1                 | 1           | 2             | 2                  | 1                  | 7            |
| A25[25]  | Ashor AW                      | 2012           | 1                 | 1           | 2             | 2                  | 2                  | 8            |
| A26[26]  | Das D, et al.                 | 2012           | 2                 | 1           | 0             | 2                  | 2                  | 7            |
| A27[27]  | de Zwaan M, et al.            | 2012           | 2                 | 1           | 0             | 2                  | 2                  | 7            |
| A7_b[28] | Kavakci O, et al.             | 2012           | 1                 | 2           | 2             | 2                  | 2                  | 9            |
| A28[29]  | Michielsen M, et al.          | 2012           | 2                 | 1           | 2             | 2                  | 1                  | 8            |
| A29[30]  | de Zwaan M, et al.            | 2011           | 2                 | 1           | 0             | 2                  | 2                  | 7            |
| A30[31]  | Park S, et al.                | 2011           | 2                 | 2           | 1             | 2                  | 2                  | 9            |
| A31[32]  | Soysal AS, et al.             | 2011           | 0                 | 1           | 1             | 2                  | 2                  | 6            |
| A32[33]  | Atwoli L, et al.              | 2010           | 2                 | 1           | 2             | 2                  | 1                  | 8            |

| ID       | Author                     | Year Published | Quality score     |             |               |                    |                    | Total scores |
|----------|----------------------------|----------------|-------------------|-------------|---------------|--------------------|--------------------|--------------|
|          |                            |                | Sample population | Sample size | Participation | Outcome assessment | Analytical methods |              |
| A33[34]  | Garnier-Dykstra LM, et al. | 2010           | 2                 | 1           | 2             | 2                  | 1                  | 8            |
| A34[35]  | Polanczyk G, et al.        | 2010           | 2                 | 2           | 0             | 2                  | 2                  | 8            |
| A7_c[36] | Kilicoglu A, et al.        | 2009           | 1                 | 1           | 0             | 2                  | 1                  | 5            |
| A35[37]  | Pagoto SL, et al.          | 2009           | 2                 | 1           | 1             | 2                  | 2                  | 8            |
| A36[38]  | Fayyad J, et al.           | 2007           | 2                 | 2           | 0             | 2                  | 2                  | 8            |
| A37[39]  | Faraone SV, et al.         | 2005           | 2                 | 1           | 0             | 2                  | 1                  | 6            |
| A38[40]  | Kooij JJS, et al.          | 2005           | 2                 | 1           | 2             | 2                  | 2                  | 9            |

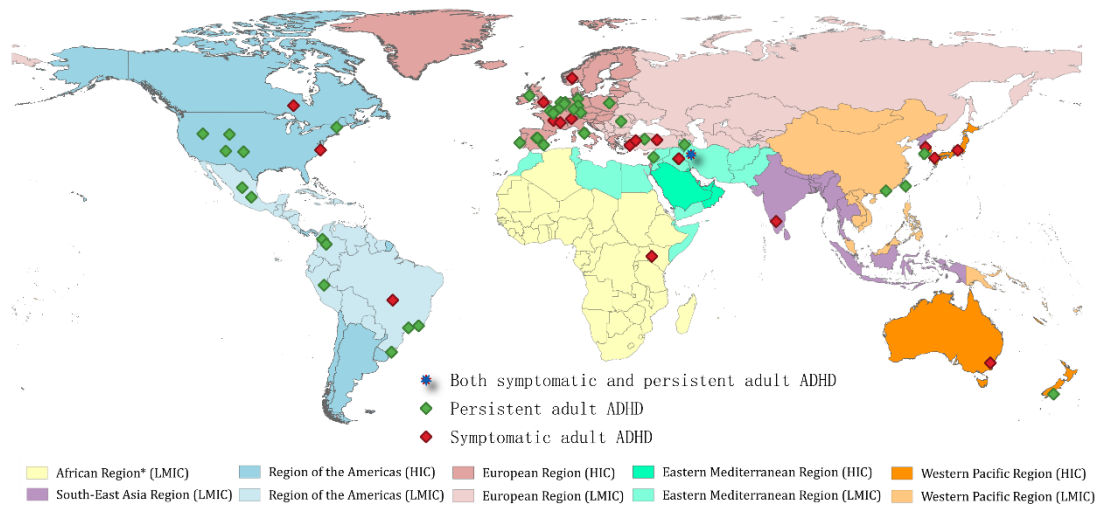

**Figure S1. Location of the included articles reporting the prevalence of persistent adult ADHD and symptomatic adult ADHD**

*Note: \* Seychelles is a high-income country according to the latest World Bank income classification, but classified into the low-income and middle-income African Region due to its relatively small population size. The total number of articles that reported the prevalence of adult ADHD in the general population and corresponding sample size in each region were: 17 in the European Region (total sample: 36035), nine in the Region of Americas (total sample: 58442), seven in the Western Pacific Region (total sample: 22440), three in the Eastern Mediterranean Region (total sample: 1148), one in the South-East Region (India, total sample: 304), one in the African Region (Kenya, total sample: 458). In addition, two articles were conducted across three regions (the European Region, the Eastern Mediterranean Region, and the Region of Americas, total sample: 38166).*

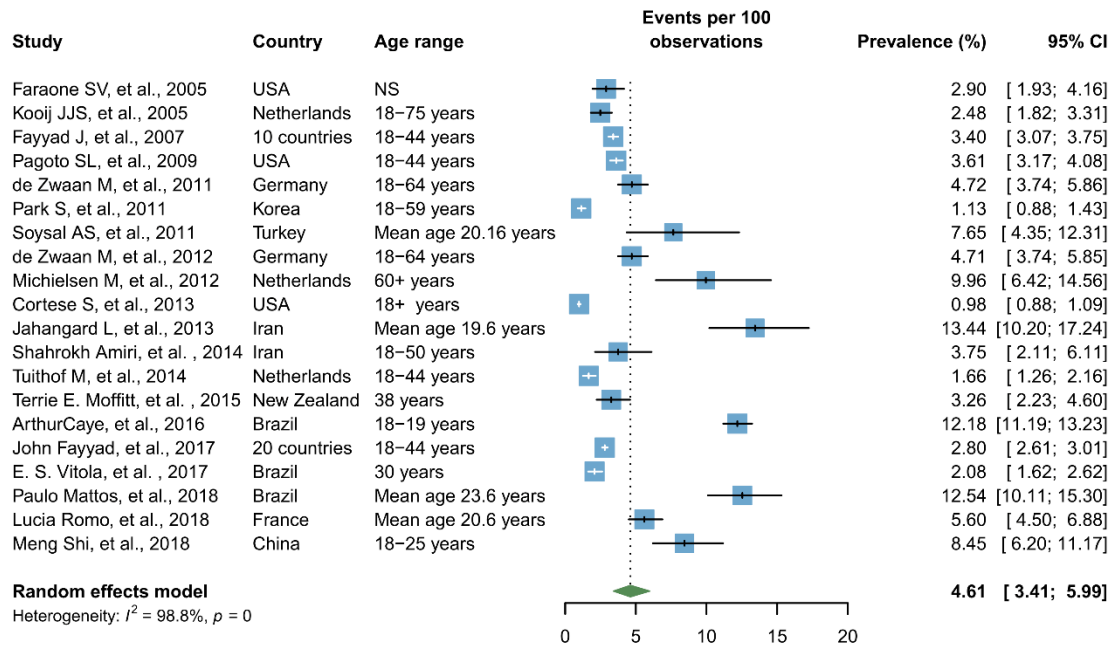

**Figure S2. Pooled prevalence of persistent adult ADHD (n=20)**



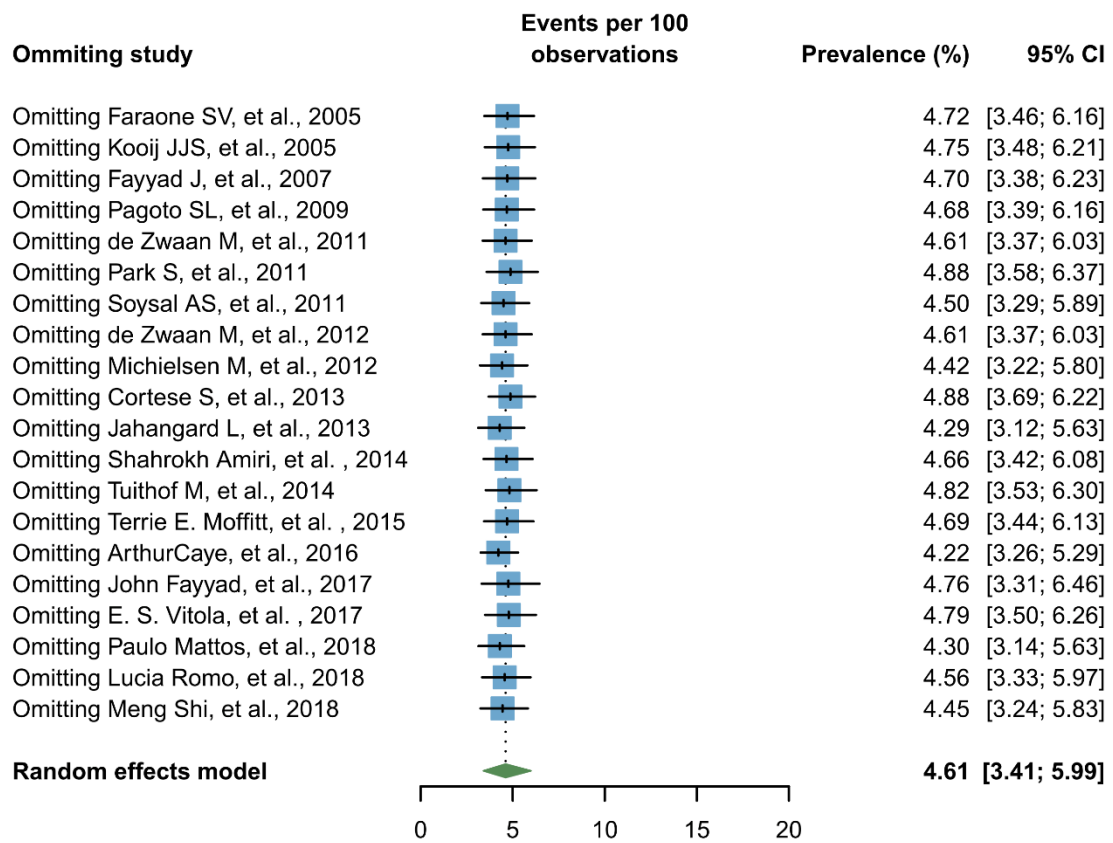

**Figure S3. Leave-one-out sensitivity analysis of the influence of single study on the pooled prevalence of persistent adult ADHD**

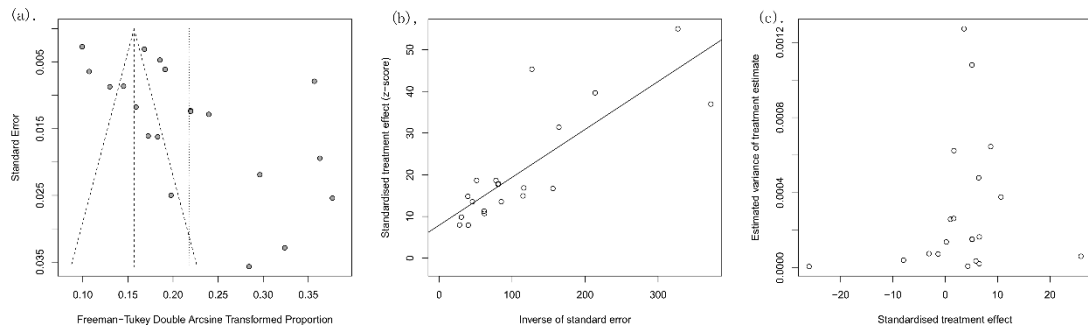

**Figure S4. Publication bias of studies on the prevalence of persistent adult ADHD**

Note: (A) Funnel plot; (B) Egger's test; (C) Begg's test.

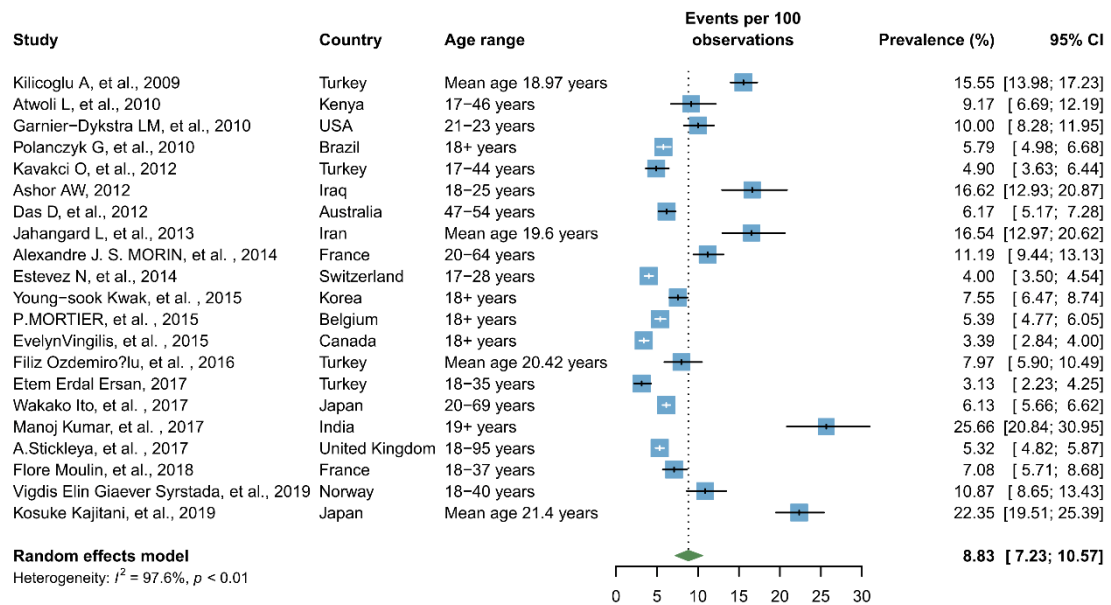

**Figure S5. Pooled prevalence of symptomatic adult ADHD (n=21)**

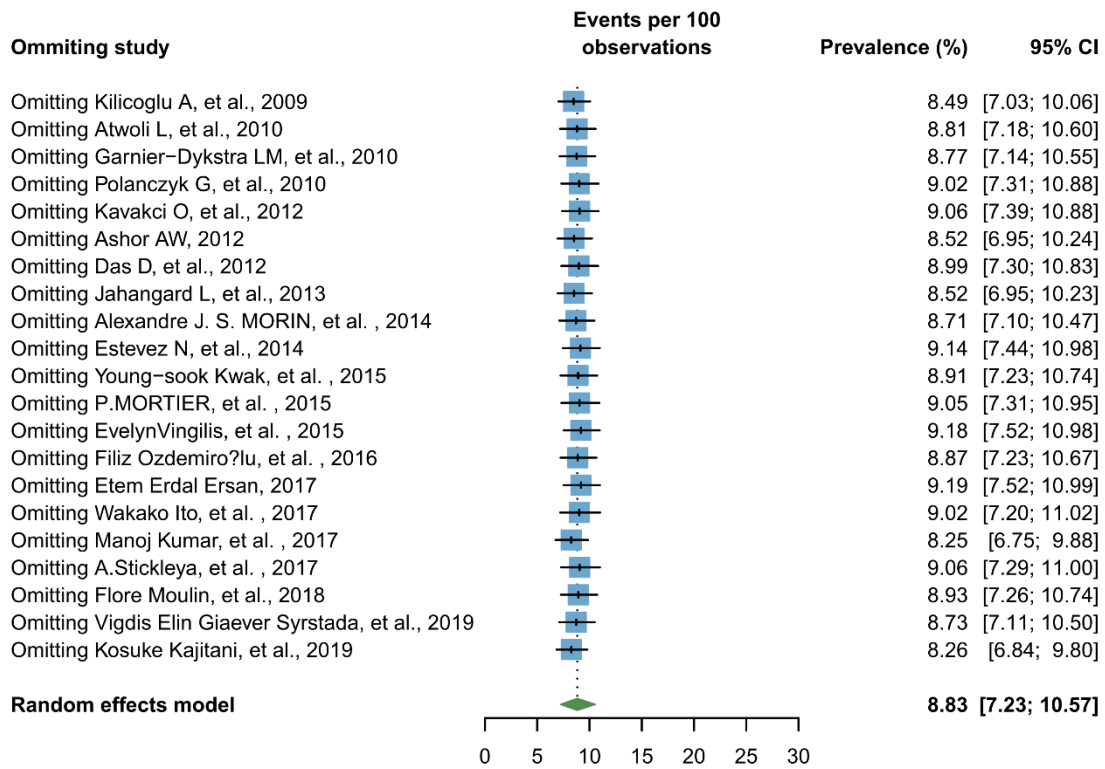

**Figure S6. Leave-one-out sensitivity analysis of the influence of single study on the pooled prevalence of symptomatic adult ADHD**

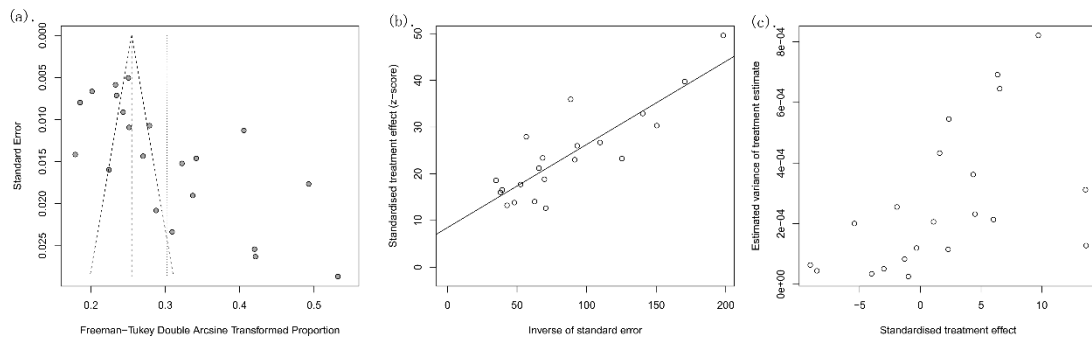

**Figure S7. Publication bias of studies on the prevalence of symptomatic adult ADHD**

*Note: (A) Funnel plot; (B) Egger's test; (C) Begg's test.*

## References

1. Syrstad, V.E.G., et al., *Cyclothymic temperament: Associations with ADHD, other psychopathology, and medical morbidity in the general population*. Journal of Affective Disorders, 2020. **260**: p. 440-447.
2. Kajitani, K., et al., *Relevance of hoarding behavior and the traits of developmental disorders among university students: A self-reported assessment study*. BioPsychoSocial Medicine, 2019. **13**.
3. Mattos, P., B.P. Nazar, and R. Tannock, *By the book: ADHD prevalence in medical students varies with analogous methods of addressing DSM items*. Revista brasileira de psiquiatria (Sao Paulo, Brazil : 1999), 2018. **40**(4): p. 382-387.
4. Moulin, F., et al., *Prevalence and Psychosocial Correlates of ADHD Symptoms in Young Adulthood: A French Population-Based Study*. Journal of attention disorders, 2018. **22**(2): p. 167-181.
5. Romo, L., et al., *Attention-deficit hyperactivity disorder and addictions (substance and behavioral): Prevalence and characteristics in a multicenter study in France*. Journal of behavioral addictions, 2018. **7**(3): p. 743-751.
6. Shi, M., et al., *Associations between symptoms of attention-deficit/ hyperactivity disorder and life satisfaction in medical students: the mediating effect of resilience*. BMC medical education, 2018. **18**(1): p. 164-164.
7. Ersan, E.E., *Signs of adult ADHD in university students and related factors*. Anadolu Psikiyatri Dergisi, 2017. **18**(4): p. 353-361.
8. Fayyad, J., et al., *The descriptive epidemiology of DSM-IV Adult ADHD in the World Health Organization World Mental Health Surveys*. Attention deficit and hyperactivity disorders, 2017. **9**(1): p. 47-65.
9. Ito, W., et al., *Excessive daytime sleepiness in adults with possible attention deficit/hyperactivity disorder (ADHD): a web-based cross-sectional study*. Sleep medicine, 2017. **32**: p. 4-9.
10. Kumar, M., et al., *Association of attention-deficit hyperkinetic disorder with alcohol use disorders in fishermen*. Journal of Neurosciences in Rural Practice, 2017. **8**(5 Supplement 1): p. 78-82.
11. Stickley, A., et al., *Attention-deficit/hyperactivity disorder and physical multimorbidity: A population-based study*. European psychiatry : the journal of the Association of European Psychiatrists, 2017. **45**: p. 227-234.
12. Vitola, E.S., et al., *Exploring DSM-5 ADHD criteria beyond young adulthood: phenomenology, psychometric properties and prevalence in a large three-decade birth cohort*. Psychological medicine, 2017. **47**(4): p. 744-754.
13. Caye, A., et al., *Attention-Deficit/Hyperactivity Disorder Trajectories From Childhood to Young Adulthood: Evidence From a Birth Cohort Supporting a Late-Onset Syndrome*. JAMA psychiatry, 2016. **73**(7): p. 705-712.
14. Ozdemiroglu, F., et al., *Sociodemographic and clinical characteristics in medical students with attention deficit hyperactivity disorder*. Tip Fakultesi Ogrencilerinde Dikkat Eksikligi ve Hiperaktivite Bozuklugunun Sosyodemografik ve Klinik Ozellikleri., 2016. **19**(1): p. 5-14.
15. Kwak, Y.S., Y.E. Jung, and M.D. Kim, *Prevalence and correlates of attention-deficit hyperactivity disorder symptoms in korean college students*. Neuropsychiatric Disease and Treatment, 2015. **11**: p. 797-802.
16. Moffitt, T.E., et al., *Is Adult ADHD a Childhood-Onset Neurodevelopmental Disorder? Evidence From a Four-Decade Longitudinal Cohort Study*. The American journal of psychiatry, 2015. **172**(10): p. 967-977.
17. Mortier, P., et al., *The epidemiology of ADHD in first-year university students*. Tijdschrift voor psychiatrie, 2015. **57**(9): p. 635-644.
18. Vingilis, E., et al., *Attention Deficit Hyperactivity Disorder Symptoms, Comorbidities, Substance Use, and Social Outcomes among Men and Women in a*

- Canadian Sample*. BioMed research international, 2015. **2015**: p. 982072-982072.
19. Amiri, S., et al., *Prevalence of adult attention deficit hyperactivity disorder (adult ADHD): Tabriz*. Iranian Journal of Psychiatry, 2014. **9**(2): p. 83-88.
  20. Caci, H.M., A.J.S. Morin, and A. Tran, *Prevalence and correlates of attention deficit hyperactivity disorder in adults from a French community sample*. The Journal of nervous and mental disease, 2014. **202**(4): p. 324-332.
  21. Estévez, N., et al., *Prevalence of and associated factors for adult attention deficit hyperactivity disorder in young Swiss men*. PloS one, 2014. **9**(2): p. e89298-e89298.
  22. Tuithof, M., et al., *Prevalence, persistency and consequences of ADHD in the Dutch adult population*. Tijdschrift voor psychiatrie, 2014. **56**(1): p. 10-19.
  23. Cortese, S., et al., *Adult attention-deficit hyperactivity disorder and obesity: epidemiological study*. The British journal of psychiatry : the journal of mental science, 2013. **203**(1): p. 24-34.
  24. Jahangard, L., et al., *Among a sample of Iranian students, adult attention deficit hyperactivity disorder is related to childhood ADHD, but not to age, gender, socioeconomic status, or birth order--an exploratory study*. International journal of psychiatry in clinical practice, 2013. **17**(4): p. 273-278.
  25. Ashor, A.W., *Variable influence of the degree of smoking dependence on adult attention deficit/hyperactivity disorder in Iraqi medical students*. Neurosciences (Riyadh, Saudi Arabia), 2012. **17**(3): p. 241-7.
  26. Das, D., et al., *A population-based study of attention deficit/hyperactivity disorder symptoms and associated impairment in middle-aged adults*. PloS one, 2012. **7**(2): p. e31500.
  27. de Zwaan, M., et al., *The estimated prevalence and correlates of adult ADHD in a German community sample*. European archives of psychiatry and clinical neuroscience, 2012. **262**(1): p. 79-86.
  28. Kavakci, O., et al., *Prevalence of attention-deficit/hyperactivity disorder and comorbid disorders among students of Cumhuriyet University*. European Journal of Psychiatry, 2012. **26**(2): p. 107-117.
  29. Michielsen, M., et al., *Prevalence of attention-deficit hyperactivity disorder in older adults in The Netherlands*. The British journal of psychiatry : the journal of mental science, 2012. **201**(4): p. 298-305.
  30. de Zwaan, M., et al., *Association between obesity and adult attention-deficit/hyperactivity disorder in a German community-based sample*. Obesity facts, 2011. **4**(3): p. 204-211.
  31. Park, S., et al., *Prevalence, correlates, and comorbidities of adult ADHD symptoms in Korea: results of the Korean epidemiologic catchment area study*. Psychiatry research, 2011. **186**(2-3): p. 378-383.
  32. Soysal, A.S., et al., *The prevalence of attention deficit hyperactivity disorder symptoms among nursing students*. Hemsirelik ogrencilerinde dikkat eksikligi hiperaktivite bozuklugu belirtilerinin yayginligi., 2011. **49**(1): p. 27-34.
  33. Atwoli, L., et al., *Self-reported attention deficit and hyperactivity disorder symptoms among university students in Eldoret, Kenya*. East African medical journal, 2010. **87**(5): p. 187-191.
  34. Garnier-Dykstra, L.M., et al., *Self-reported adult attention-deficit/hyperactivity disorder symptoms among college students*. Journal of American college health : J of ACH, 2010. **59**(2): p. 133-136.
  35. Polanczyk, G., et al., *ADHD in a representative sample of the Brazilian population: estimated prevalence and comparative adequacy of criteria between adolescents and adults according to the item response theory*. International journal of methods in psychiatric research, 2010. **19**(3): p. 177-184.

36. Kilicoglu, A., et al., *The assessment of attention deficit hyperactivity disorder symptoms in university students*. Universite ogrencilerinde kendilerinin bildirdikleri dikkat eksikligi hiperaktivite bozuklugu belirtilerinin degerlendirilmesi., 2009. **10**(2): p. 88-93.
37. Pagoto, S.L., et al., *Association between adult attention deficit/hyperactivity disorder and obesity in the US population*. Obesity (Silver Spring, Md.), 2009. **17**(3): p. 539-544.
38. Fayyad, J., et al., *Cross-national prevalence and correlates of adult attention-deficit hyperactivity disorder*. The British journal of psychiatry : the journal of mental science, 2007. **190**: p. 402-409.
39. Faraone, S.V. and J. Biederman, *What is the prevalence of adult ADHD? Results of a population screen of 966 adults*. Journal of attention disorders, 2005. **9**(2): p. 384-391.
40. Kooij, J.J.S., et al., *Internal and external validity of attention-deficit hyperactivity disorder in a population-based sample of adults*. Psychological medicine, 2005. **35**(6): p. 817-827.
